# Supplementary material for: Multi-Elements in Source Water (Drinking and Surface Water) within Five Cities from the Semi-Arid and Arid Region, NW China: Occurrence, Spatial Distribution and Risk Assessment
Source: MDPI journal article supplement (doi:10.3390/ijerph14101168), 2017-10-02
Supplement: s1 [file s1]

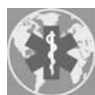

## Supplementary Materials: Multi-elements in Source Water (Drinking and Surface Water) within Five Cities from the Semi-Arid and Arid Region, NW China: Occurrence, Spatial Distribution and Risk Assessment

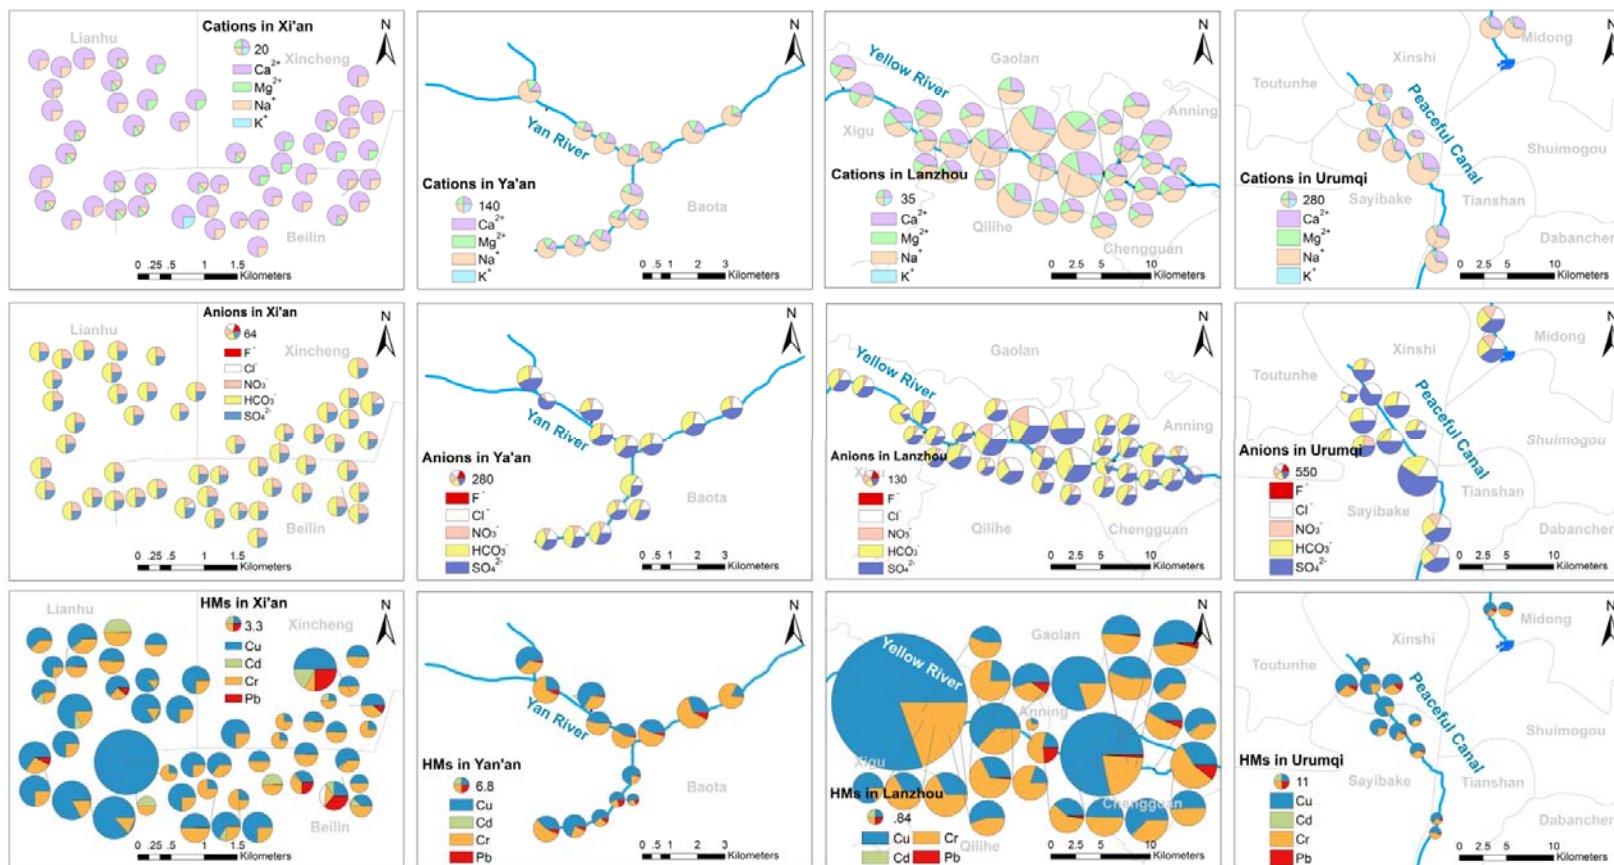

Figure S1. Spatial distributions of cations, anions and HMs of DW and SW in Xi'an, Yan'an, Lanzhou and Urumqi.

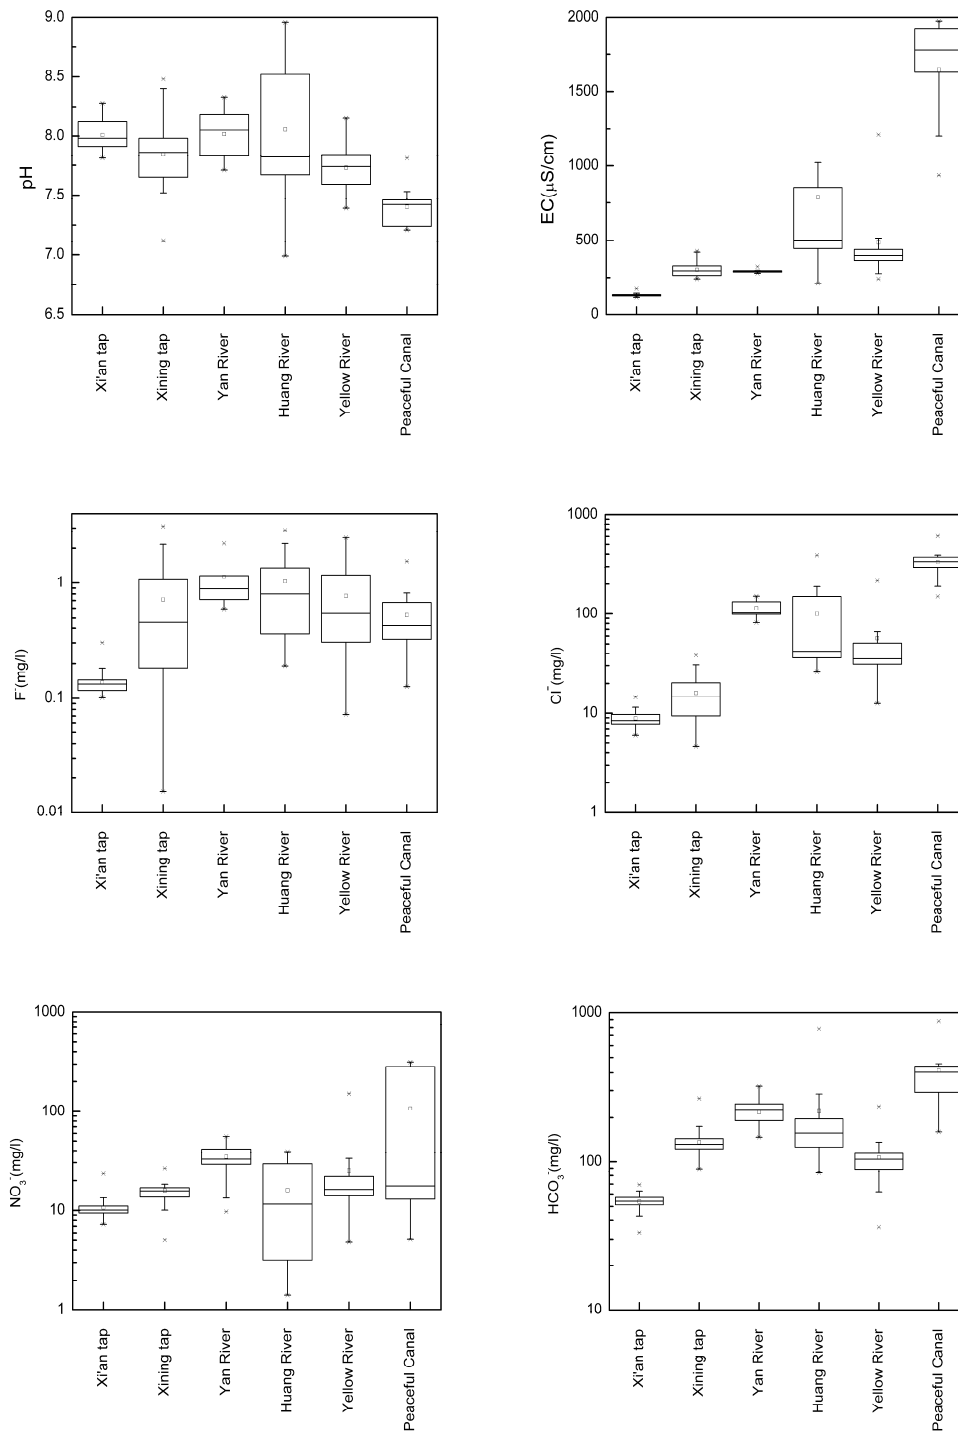

Figure S2. Cont.

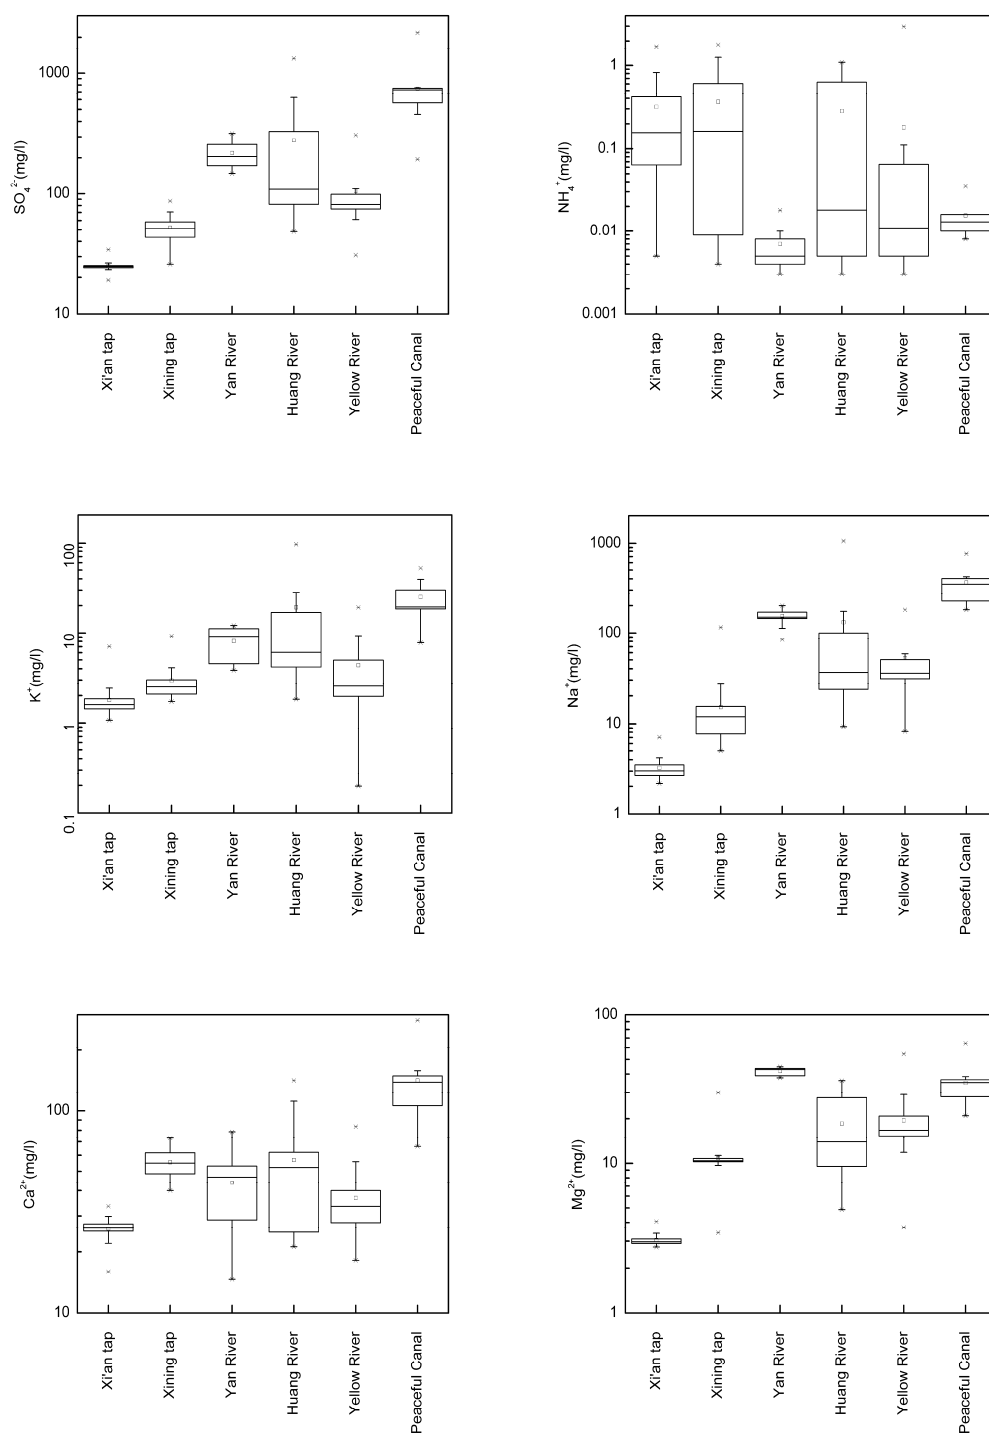

Figure S2. Cont.

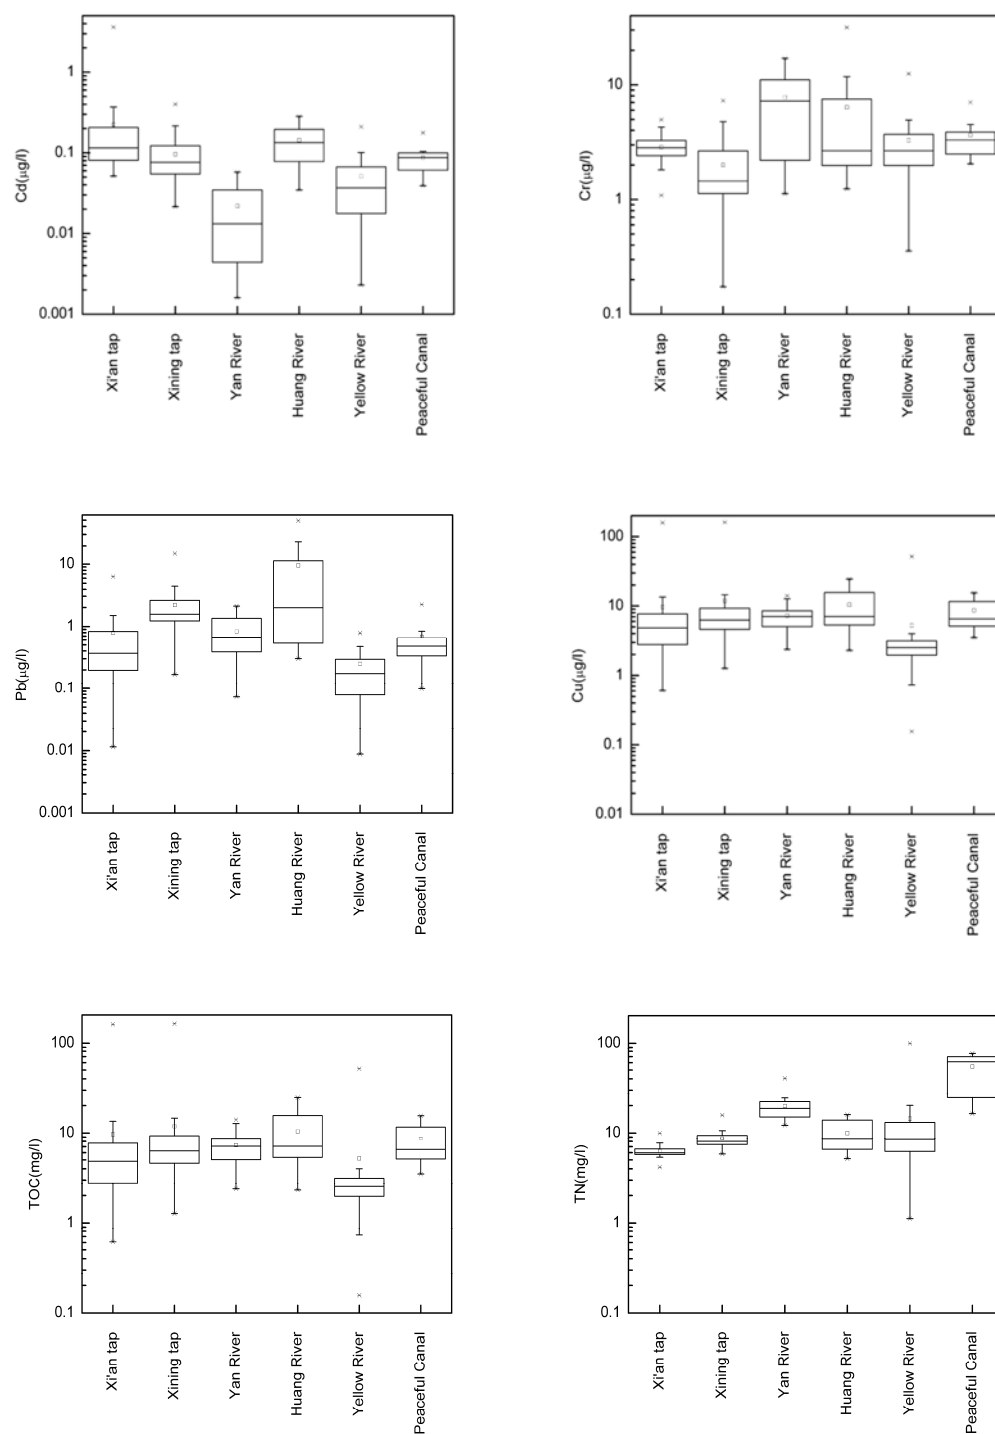

**Figure S2.** Boxplots comparing MEs of DW and SW in the study areas.

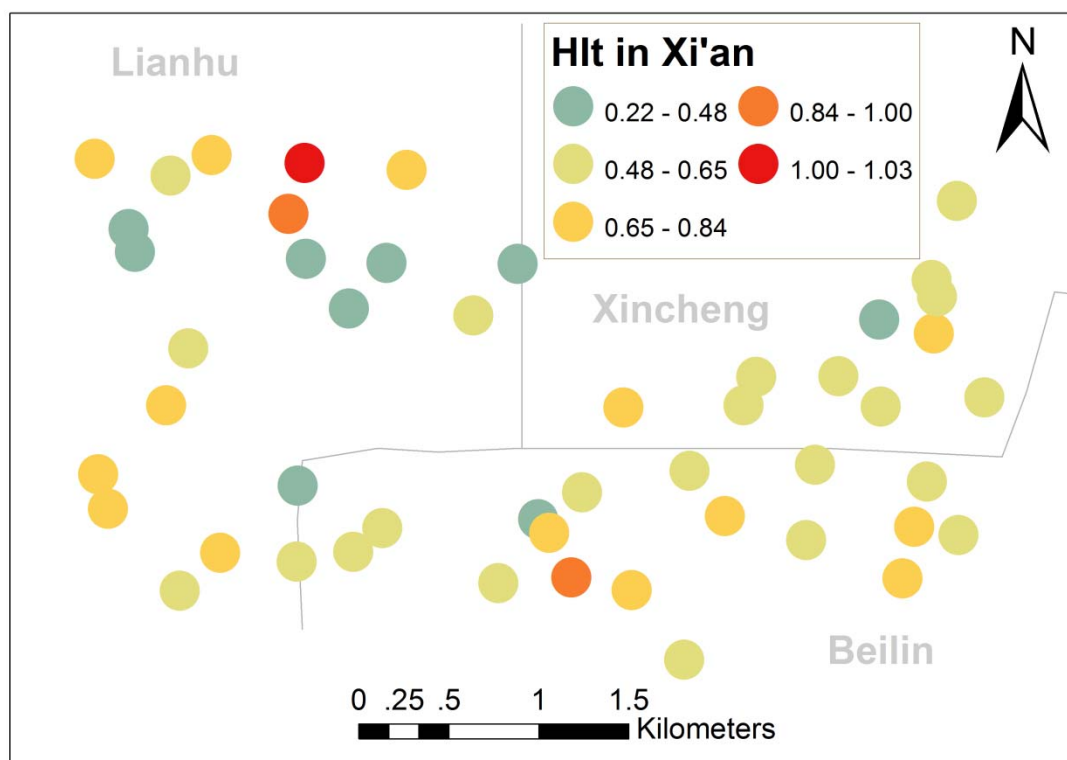

(a)

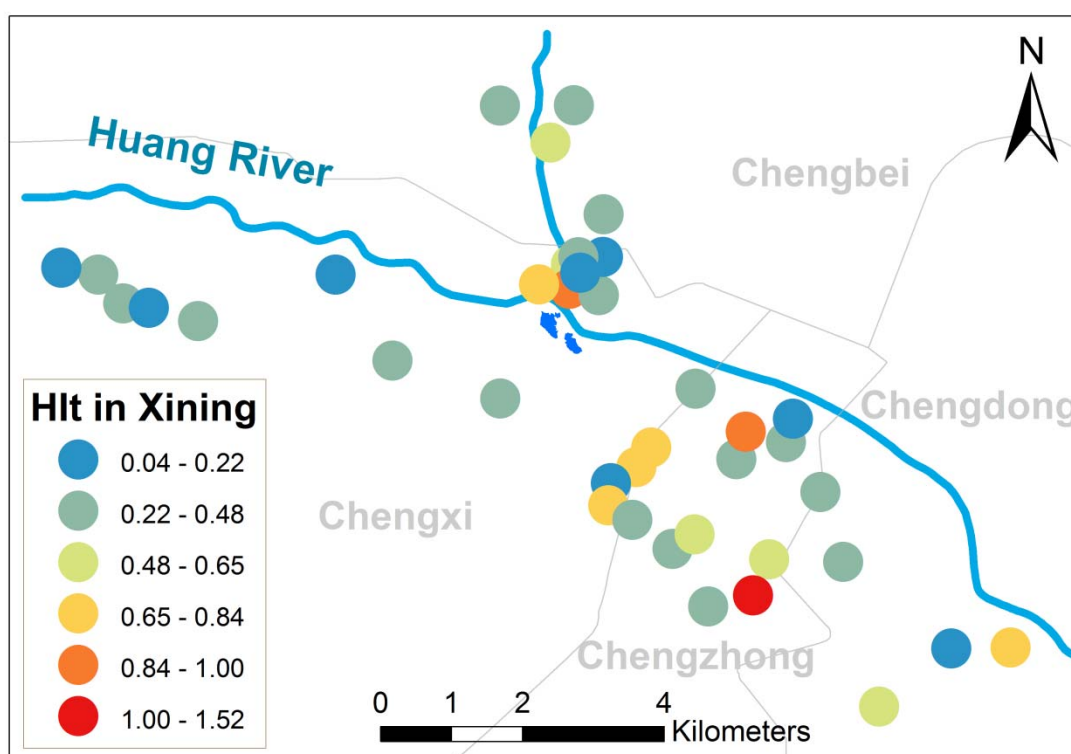

(b)

**Figure S3.** Spatial distributions of total hazard index (HIt) of DW in Xi'an (a) and Xining (b).
